# Supplementary material for: 11β-HSD1 inhibition ameliorates diabetes-induced cardiomyocyte hypertrophy and cardiac fibrosis through modulation of EGFR activity
Source: PubMed Central journal article supplement (PMC5707098; doi:10.18632/oncotarget.22015), 2017-10-24
Supplement: oncotarget-08-96263-s001.pdf [file oncotarget-08-96263-s001.pdf]

## 11 $\beta$ -HSD1 inhibition ameliorates diabetes-induced cardiomyocyte hypertrophy and cardiac fibrosis through modulation of EGFR activity

### SUPPLEMENTARY MATERIALS

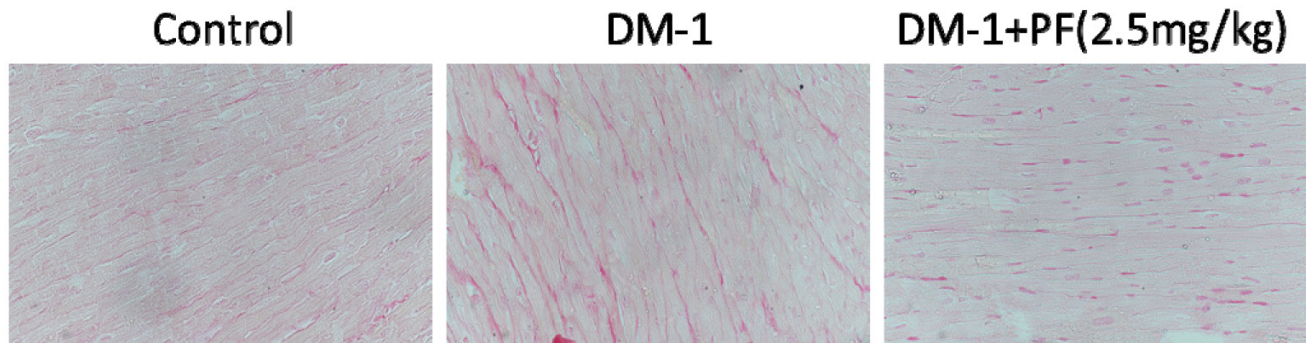

**Supplementary Figure 1: PF reduced cardiac fibrosis in STZ-induced type 1 diabetic mice.** Diabetes was induced in male C57/BL6 mice by a single intraperitoneal (i.p.) injection of STZ (100mg/kg). Diabetic mice (blood glucose >12 mmol/L) were treated with 11 $\beta$ -HSD1 inhibitor PF-915275 (PF, 2.5 mg/kg) or vehicle by oral gavage once every 2 days for 11 weeks (n = 8 in each group). Representative images of Sirius Red staining for heart tissue sections are shown (red color = collagen).

**Supplementary Table 1: Primers used in real-time qPCR assay**

| Gene           | Species | FW                     | RW                    |
|----------------|---------|------------------------|-----------------------|
| ANP            | Rat     | GAGGAGAAGATGCCGGTAG    | TCAGAGAGGGAGCTAAGTG   |
| BNP            | Rat     | TTCCGGATCCAGGAGAGACTT  | CCTAAAACAACCTCAGCCCGT |
| $\beta$ -Actin | Rat     | AAGTCCCTCACCTCCAAAAG   | AAGCAATGCTGTACCTTCCC  |
| TGF- $\beta$   | Mouse   | TGACGTCACTGGAGTTGTACGG | GGTTCATGTCATGGATGGTGC |
| Collagen1      | Mouse   | TGGCCTTGGAGGAACTTTG    | CTTGAAACCTTGTGGACCAG  |
| $\alpha$ -MyHC | Mouse   | CGAGTCCCAGGTCAACAAG    | AGGCTCTTTCTGCTGGACA   |
| $\beta$ -Actin | Mouse   | CCGTGAAAAGATGACCCAGA   | TACGACCAGAGGCATACAG   |
